# Supplementary material
Source: PubMed Central journal article supplement (PMC4547473)
Supplement: NIHMS688145-supplement-Supplemental_Digital_Content_1.pdf [file NIHMS688145-supplement-Supplemental_Digital_Content_1.pdf]

**Table, Supplemental Digital Content 1**

| Parameter | Description                                                                                                                                                                                                                                                  |
|-----------|--------------------------------------------------------------------------------------------------------------------------------------------------------------------------------------------------------------------------------------------------------------|
|           | Axial images are standardized by orienting the scan parallel to the tibial plafond. The first 8 measurements are taken 1cm proximal to the tibial plafond                                                                                                    |
| a         | Distance between the most anterior point of the incisura and the nearest most anterior point of the fibula                                                                                                                                                   |
| b         | Distance between the most anterior point of the incisura and the nearest most anterior point of the fibula                                                                                                                                                   |
| c         | Distance between the tibia and fibula in the mid-point of the incisura                                                                                                                                                                                       |
| d         | 3 step measurement:<br>-A line is drawn between the most anterior and most posterior points of the incisura<br>-A perpendicular line is drawn in the middle of the first line<br>Distance between the most anterior part of the fibula and the perpendicular |
| e         | Distance between the most posterior part of the fibula and the perpendicular line from measurement d                                                                                                                                                         |
| f         | The perpendicular line is brought to the level of the most anterior part of the incisura<br>Distance between the perpendicular and the most anterior point of the fibula                                                                                     |
| g         | Distance between the incisura line and the most medial part of the fibula (negative value is medial to the line)                                                                                                                                             |
| Angle 1   | Angle between a line drawn between the anterior and posterior point of the incisura and a line drawn in the fibula representing the anterior-posterior axis (internal rotation is negative values)                                                           |
| Angle 2   | Measured at the level of the talar dome, the angle between the articular surfaces of the malleoli                                                                                                                                                            |

Descriptions of the measurements used in this study, adapted from Nault et al.(1) and Phisitkul et al.(2)

1. Nault ML, Hebert-Davies J, Laflamme GY, et al. CT Scan Assessment of the Syndesmosis: A New Reproducible Method. *J Orthop Trauma*. 2013;27:638-641.
2. Phisitkul P, Ebinger T, Goetz J, et al. Forceps reduction of the syndesmosis in rotational ankle fractures: a cadaveric study. *J Bone Joint Surg Am*. 2012;94:2256-2261.
