# Supplementary material
Source: PubMed Central journal article supplement (PMC4547473)

Figure, Supplemental Digital Content 2. Injured extremity, Angle 2, measured at the level of the talar dome. When compared to the contralateral, uninjured extremity of the same patient (Figure 6), the injured extremity is externally malrotated by 14°.

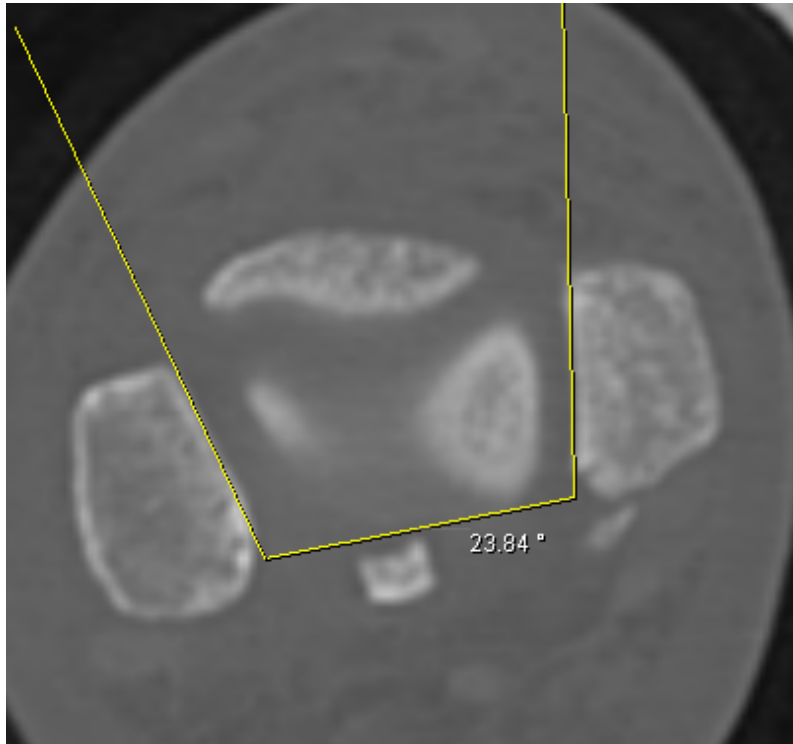

Supplement: NIHMS688145-supplement-Supplemental_Digital_Content_2.pdf [file NIHMS688145-supplement-Supplemental_Digital_Content_2.pdf]
