# Supplementary material
Source: PubMed Central journal article supplement (PMC4547473)

Figure, Supplemental Digital Content 3. Uninjured extremity for the patient in figure 5, Angle 2 is shown.

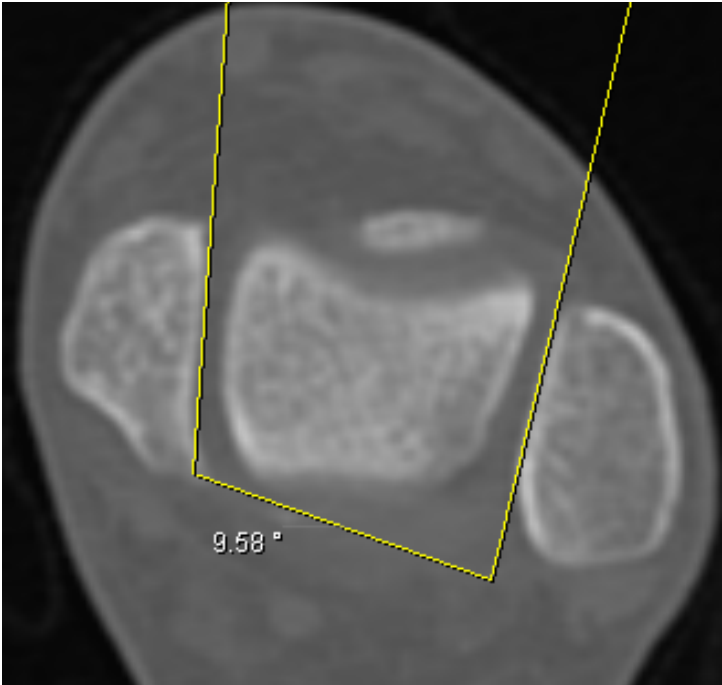

Supplement: NIHMS688145-supplement-Supplemental_Digital_Content_3.pdf [file NIHMS688145-supplement-Supplemental_Digital_Content_3.pdf]
