# Supplementary material
Source: PubMed Central journal article supplement (PMC4547473)
Supplement: NIHMS688145-supplement-Supplemental_Digital_Content_4.pdf [file NIHMS688145-supplement-Supplemental_Digital_Content_4.pdf]

**Table, Supplemental Digital Content 4, Patients without a posterior malleolar injury, n=13**

| Measurement (Injured-noninjured) | Mean | Std. Deviation | 95% Confidence Interval of the Difference |       | Sig. (2-tailed) |
|----------------------------------|------|----------------|-------------------------------------------|-------|-----------------|
|                                  |      |                | Lower                                     | Upper |                 |
| A (mm)                           | -0.2 | 0.2            | -1.1                                      | 0.7   | 0.6             |
| B (mm)                           | -0.8 | 0.2            | -1.7                                      | 0.1   | 0.1             |
| C* (mm)                          | -0.9 | 0.1            | -1.4                                      | -0.4  | 0.0*            |
| D (mm)                           | -1.3 | 0.4            | -3.9                                      | 1.2   | 0.3             |
| E (mm)                           | -0.3 | 0.2            | -1.3                                      | 0.8   | 0.6             |
| F (mm)                           | 0.3  | 0.2            | -0.7                                      | 1.3   | 0.5             |
| G* (mm)                          | -1.0 | 0.1            | -1.5                                      | -0.6  | 0.0*            |
| Angle 1 (degrees)                | 16.4 | 6.3            | -2.2                                      | 5.5   | 0.4             |
| Angle 2 (degrees)                | 23.0 | 4.8            | -0.6                                      | 5.2   | 0.1             |

(\* represents p<0.05)
