# Supplementary material
Source: PubMed Central journal article supplement (PMC4547473)
Supplement: NIHMS688145-supplement-Supplemental_Digital_Content_5.pdf [file NIHMS688145-supplement-Supplemental_Digital_Content_5.pdf]

**Table Supplemental Digital Content 5, Patients with a posterior malleolar injury, n=14**

| Measurement (Injured-noninjured) | Mean  | Std. Deviation | 95% Confidence Interval of the Difference |       | Sig. (2-tailed) |
|----------------------------------|-------|----------------|-------------------------------------------|-------|-----------------|
|                                  |       |                | Lower                                     | Upper |                 |
| A (mm)                           | 0.2   | 0.2            | -0.7                                      | 1.1   | 0.7             |
| B (mm)                           | -0.5  | 0.1            | -1.2                                      | 0.2   | 0.1             |
| C (mm)                           | -0.6  | 0.1            | -1.4                                      | 0.2   | 0.1             |
| D (mm)                           | -0.3  | 0.1            | -0.9                                      | 0.4   | 0.4             |
| E (mm)                           | 1.0   | 0.3            | -0.5                                      | 2.5   | 0.2             |
| F (mm)                           | -0.01 | 0.2            | -0.8                                      | 0.9   | 1.0             |
| G* (mm)                          | -1.0  | 0.2            | -2.0                                      | -0.0  | 0.04*           |
| Angle1 (degrees)                 | 32.2  | 5.9            | -0.18                                     | 6.61  | 0.1             |
| Angle2* (degrees)                | 65.0  | 7.5            | 2.20                                      | 10.80 | 0.0*            |

(\* represents p<0.05)
