# Supplementary material
Source: PubMed Central journal article supplement (PMC4547473)
Supplement: NIHMS688145-supplement-Supplemental_Digital_Content_6.pdf [file NIHMS688145-supplement-Supplemental_Digital_Content_6.pdf]

**Table, Supplemental Digital Content 6.** Weber B fractures, n=8

| Measurement (Injured-<br>noninjured) |       |                |                                              |       | Sig. (2-tailed) |
|--------------------------------------|-------|----------------|----------------------------------------------|-------|-----------------|
|                                      | Mean  | Std. Deviation | 95% Confidence Interval of the<br>Difference |       |                 |
|                                      |       |                | Lower                                        | Upper |                 |
| A (mm)                               | -0.3  | 0.1            | -1.9                                         | 0.7   | 0.6             |
| B (mm)                               | -0.3  | 0.1            | -1.4                                         | 0.7   | 0.5             |
| C (mm)                               | -0.8  | 0.2            | -2.1                                         | 0.4   | 0.2             |
| D (mm)                               | -0.3  | 0.1            | -1.5                                         | 1.0   | 0.6             |
| E (mm)                               | 0.7   | 0.2            | -1.0                                         | 2.5   | 0.4             |
| F (mm)                               | 0.3   | 0.2            | -1.1                                         | 1.8   | 0.6             |
| G (mm)                               | -1.1  | 0.2            | -2.5                                         | 0.3   | 0.1             |
| Angle1 (degrees)                     | -15.4 | 8.4            | -8.6                                         | 5.5   | 0.6             |
| Angle2 (degrees)                     | 26.2  | 3.4            | -0.2                                         | 5.5   | 0.1             |

(\* represents  $p < 0.05$ )
