# Supplementary material
Source: PubMed Central journal article supplement (PMC4547473)
Supplement: NIHMS688145-supplement-Supplemental_Digital_Content_7.pdf [file NIHMS688145-supplement-Supplemental_Digital_Content_7.pdf]

**Table, Supplemental Digital Content 7.** Suprasyndesmotic lesions, n=19. This includes 5 patients with Maisonneuve-type injuries

| Measurement (Injured-noninjured) | Mean | Std. Deviation | 95% Confidence Interval of the |       | Sig. (2-tailed) |
|----------------------------------|------|----------------|--------------------------------|-------|-----------------|
|                                  |      |                | Lower                          | Upper |                 |
| A (mm)                           | 0.11 | 0.2            | -0.8                           | 1.0   | 0.8             |
| B* (mm)                          | -0.7 | 0.1            | -1.4                           | -0.1  | 0.03            |
| C* (mm)                          | -0.7 | 0.1            | -1.1                           | -0.2  | 0.0*            |
| D (mm)                           | -1.1 | 0.4            | -3.0                           | 0.8   | 0.2             |
| E (mm)                           | 0.4  | 0.3            | -0.9                           | 1.6   | 0.5             |
| F (mm)                           | 0.1  | 0.1            | -0.6                           | 0.8   | 0.7             |
| G* (mm)                          | -1.0 | 0.1            | -1.6                           | -0.4  | 0.0*            |
| Angle 1* (degrees)               | 42.0 | 4.1            | 2.1                            | 6.3   | 0.0*            |
| Angle 2* (*degrees)              | 50.0 | 7.7            | 1.0                            | 9.0   | 0.02*           |

(\* represents p<0.05)
