# Supplementary material
Source: PubMed Central journal article supplement (PMC4547473)
Supplement: NIHMS688145-supplement-Supplemental_Digital_Content_8.pdf [file NIHMS688145-supplement-Supplemental_Digital_Content_8.pdf]

**Table, Supplemental Digital Content 8**

Measurement values for patients with indirect syndesmosis reduction using pointed reduction forceps, (6 patients).

All side-to-side differences were statistically not significant ( $p>0.05$ ).

| Measurement (Injured-Uninjured) | Mean  | Std. Deviation | 95% Confidence Interval of the Difference |       | Sig. (2-tailed) |
|---------------------------------|-------|----------------|-------------------------------------------|-------|-----------------|
|                                 |       |                | Lower                                     | Upper |                 |
| A (mm)                          | 1.27  | 0.15           | -0.03                                     | 0.28  | 0.10            |
| B (mm)                          | -0.30 | 0.08           | -0.11                                     | 0.05  | 0.39            |
| C (mm)                          | -0.30 | 0.11           | -0.15                                     | 0.09  | 0.55            |
| D (mm)                          | -0.47 | 0.11           | -0.17                                     | 0.07  | 0.37            |
| E (mm)                          | 0.47  | 0.17           | -0.13                                     | 0.22  | 0.52            |
| F (mm)                          | 0.77  | 0.20           | -0.13                                     | 0.28  | 0.38            |
| G (mm)                          | -0.57 | 0.09           | -0.15                                     | 0.04  | 0.18            |
| Angle1 (degrees)                | 10.5  | 8.17           | -7.52                                     | 9.62  | 0.77            |
| Angle2 (degrees)                | 67.5  | 8.50           | -2.17                                     | 15.67 | 0.11            |
