# Supplementary material
Source: PubMed Central journal article supplement (PMC4547473)
Supplement: NIHMS688145-supplement-Supplemental_Digital_Content_9.pdf [file NIHMS688145-supplement-Supplemental_Digital_Content_9.pdf]

**Table, Supplemental Digital Content 9**

**Cronbach Alpha values for each measurement (intra-rater reliability)**

| Rater | Injured | Non-Injured | Rater | Injured | Non-Injured |
|-------|---------|-------------|-------|---------|-------------|
| A     | .30     | .094        | A     | .46     | .86         |
| B     | .66     | .92         | B     | .83     | .70         |
| C     | -.095   | .45         | C     | .28     | -.62        |
| D     | .98     | .74         | D     | .98     | .96         |
| E     | .93     | .88         | E     | .95     | .86         |
| F     | .96     | .97         | F     | .91     | -.65        |
| G     | .99     | .97         | G     | .98     | .98         |
| A1    | .76     | .89         | A1    | .80     | .23         |
| A2    | .87     | .97         | A2    | .85     | .99         |

> .9 – Excellent, > .8 – Good, > .7 – Acceptable, > .6 – Questionable, > .5 – Poor, and < .5 – Unacceptable(1)

1. George D, Mallery P. *SPSS for Windows Step by Step: A Simple Guide and Reference, 11.0 Update*. Allyn and Bacon; 2003.
