# Supplementary material
Source: PubMed Central journal article supplement (PMC4547473)
Supplement: NIHMS688145-supplement-Supplemental_Digital_Content_10.pdf [file NIHMS688145-supplement-Supplemental_Digital_Content_10.pdf]

**Table, Supplemental Digital Content 10**

**Cronbach Alpha values for each measurement (inter-rater reliability)**

| MEASURE | Injured | Non-injured |
|---------|---------|-------------|
| A       | .49     | .24         |
| B       | .82     | .80         |
| C       | .55     | .21         |
| D       | .95     | .66         |
| E       | .82     | .74         |
| F       | .88     | .95         |
| G       | .99     | .98         |
| A1      | .27     | -.31        |
| A2      | .71     | .96         |

> .9 – Excellent, > .8 – Good, > .7 – Acceptable, > .6 – Questionable, > .5 – Poor, and < .5 – Unacceptable(1)

1. George D, Mallery P. *SPSS for Windows Step by Step: A Simple Guide and Reference, 11.0 Update*. Allyn and Bacon; 2003.
